# Supplementary material
Source: PubMed Central journal article supplement (PMC4201500)
Supplement: NIHMS632785-supplement.pdf [file NIHMS632785-supplement.pdf]

**Figure S1**

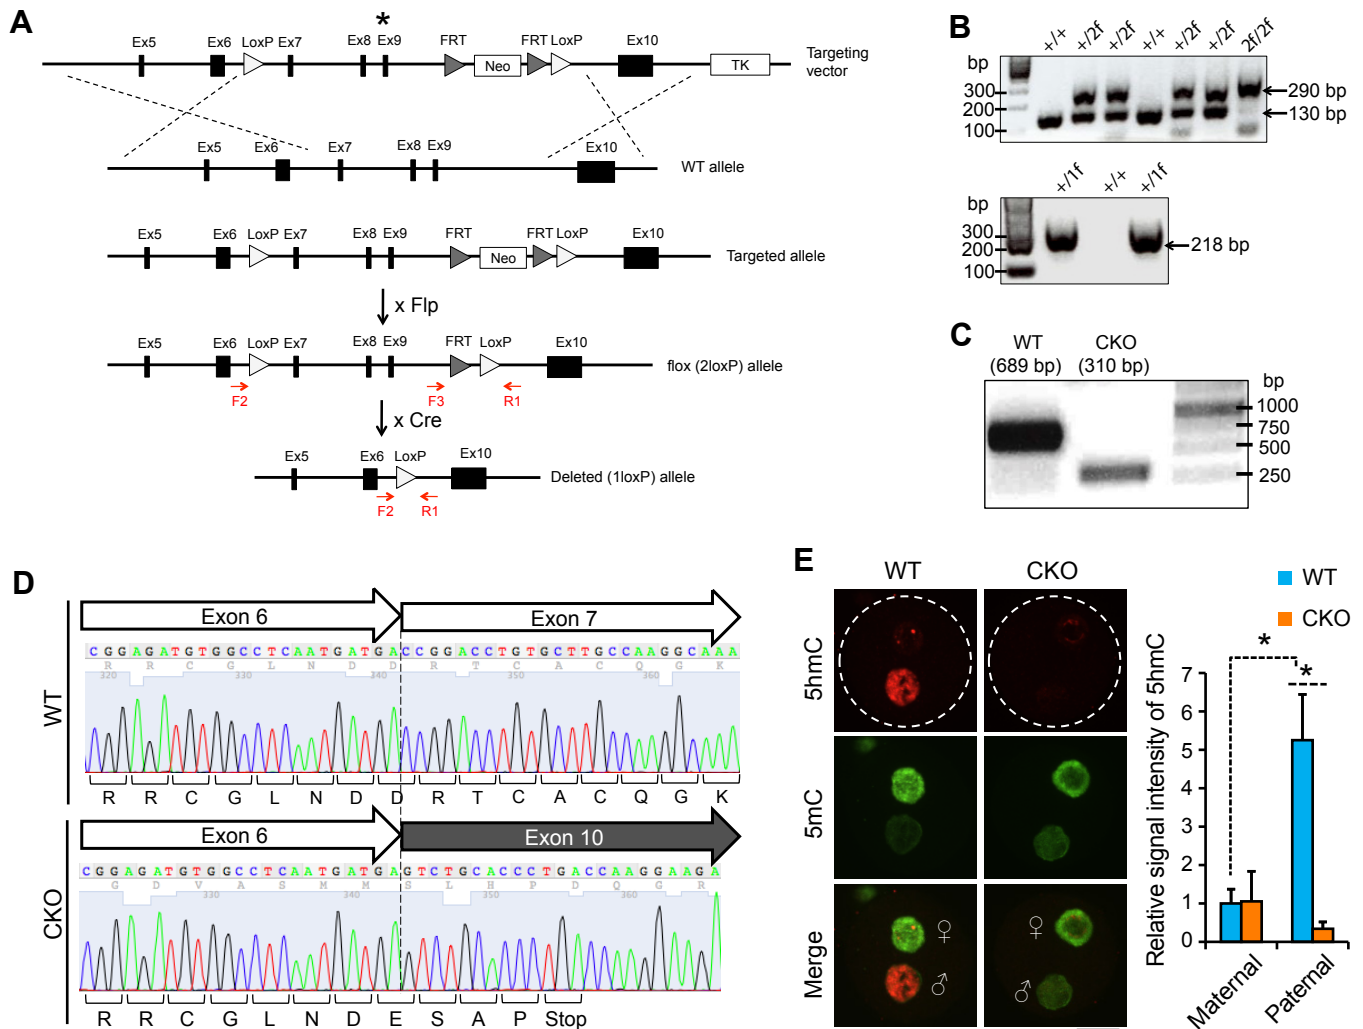

**Figure S1. Targeted disruption of Tet3 gene**

(A) Strategy for targeted disruption of the Tet3 gene. Black boxes indicate the coding exons of Tet3. The asterisk above exon 9 indicates the catalytic domain of Tet3 that has the iron-binding motif essential for its enzymatic activity. Primers used for mouse genotyping are indicated by red arrows.

(B) Representative images of genotyping of mouse tail DNA. The primer set of F3 and R1 was used to detect WT (130 bp) and 2flox (290 bp) alleles. The primer set of F2 and R1 was used to detect 1flox allele (218 bp).

(C and D) Confirmation of exon 7-9 deletion in CKO oocytes. After cDNA preparation by reverse transcription of total RNA from WT or CKO oocytes, PCR amplification using

primers amplifying exons 6 and 10 were performed (C). The PCR products were then read by Sanger sequencing, which confirmed that exons 7-9 are indeed deleted in CKO oocytes (D). The amino acids translated from the mRNAs are shown. Note that Tet3 protein is truncated in CKO oocytes.

(E) Representative images of zygotes stained with anti-5hmC (red) and anti-5mC (green) antibodies at 8 hours after fertilization. Scale bar, 20  $\mu$ m. The graph at right represents relative signal intensity of 5hmC. The value of the maternal pronucleus in WT zygotes was set as 1.0. A total of 23 and 18 of WT and CKO zygotes, respectively, were examined.

\* $P < 0.01$  by Student's t-test. Error bars, s.d.

Related to Figure 1

**Figure S2**

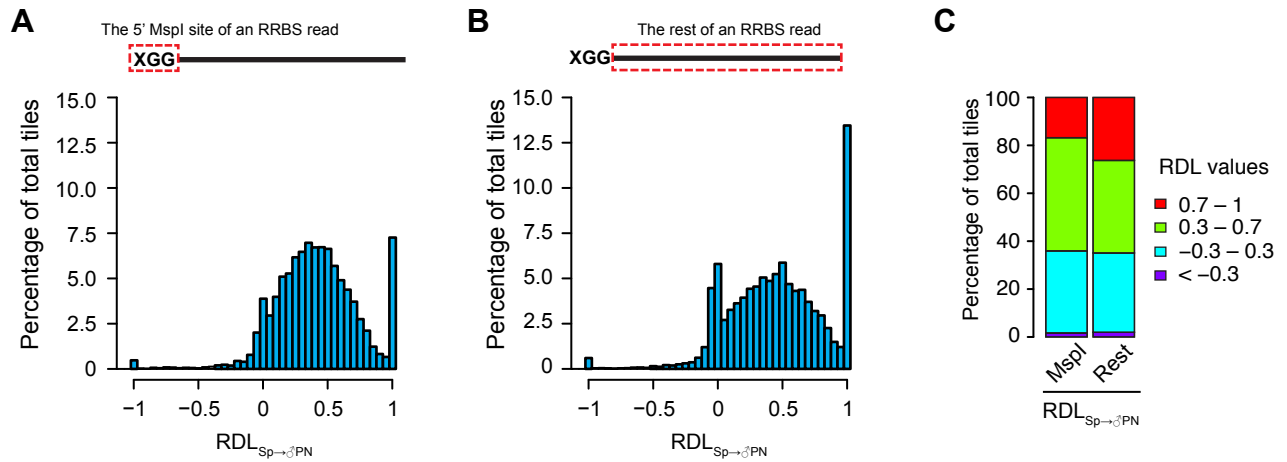

**Figure S2. 5fC and 5caC partially contribute to the observed active paternal DNA demethylation.**

(A and B) Histograms of  $RDL_{Sp \rightarrow \sigma PN}$  values in WT zygotes using DNA methylation information separately extracted from the MspI site at the 5'-end of RRBS reads (A) or from the rest of the reads (B). Only 100-bp tiles that are methylated in sperm ( $ML_{Sperm} \geq 20\%$ ) were analyzed. Since the 5' MspI site of an RRBS read is depleted of 5fC/5caC, the decreased percentage of fully demethylated tiles in (A) compared with (B) suggests the contribution of 5fC/5caC in the observed active DNA demethylation.  $RDL_{Sp \rightarrow \sigma PN}$  is defined as  $[(ML_{Sp} - ML_{\sigma PN}) / ML_{Sp}]$ . RDL values less than -1 were set to -1.

(C) Distribution of  $RDL_{Sp \rightarrow \sigma PN}$  values in (A) and (B). The RDL values are divided into four groups marked by red (0.7–1), green (0.3–0.7), blue (-0.3–0.3), and purple (<-0.3).

See also Figure 2

### Figure S3

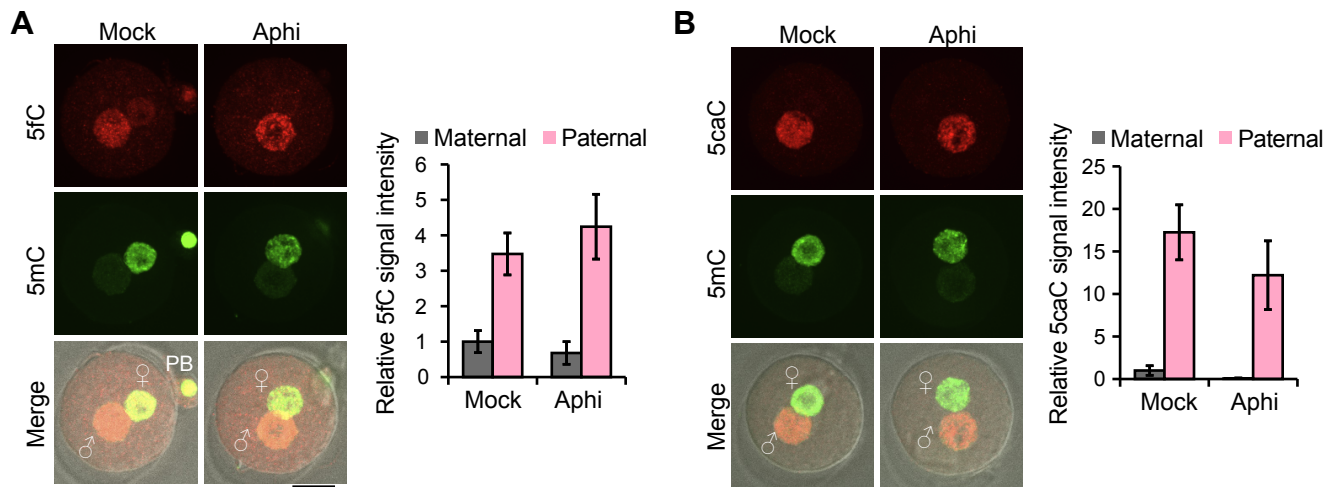

#### Figure S3. Inhibition of DNA replication does not affect Tet3-mediated 5mC oxidation.

(A and B) Representative images of zygotes stained with anti-5fC (A) or -5caC (B) and anti-5mC antibodies are shown. Zygotes were incubated in the media with or without Aphidicolin. Scale bar, 20  $\mu$ m. The graphs on the right indicate relative signal intensity of 5fC or 5caC. The value of the maternal pronucleus in Mock zygotes was set as 1.0. For 5fC staining, both Mock and Aphi groups used a total of 19 zygotes. For 5caC staining, Mock and Aphi groups used a total of 19 and 16 zygotes, respectively. Error bars, s.d.

Related to Figure 3

**Figure S4**

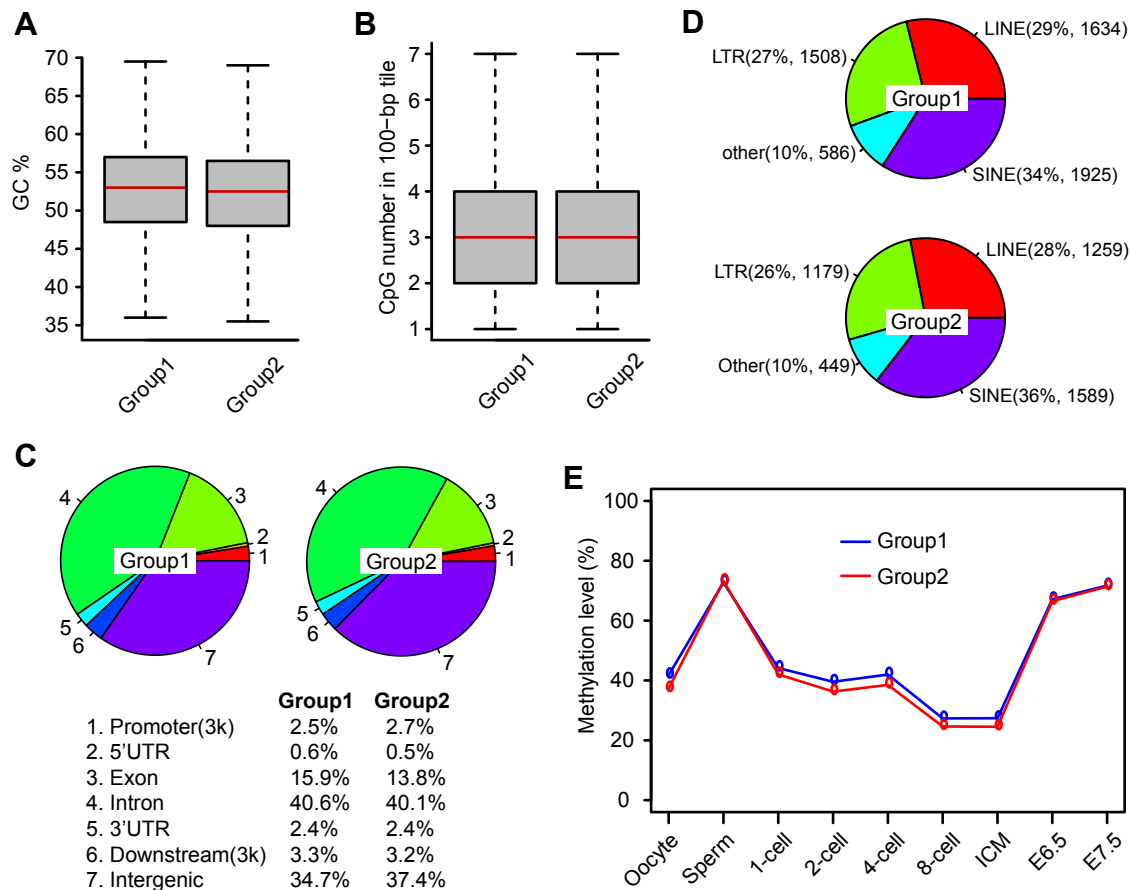

**Figure S4. Group1 and Group2 tiles share similar genomic features and dynamic DNA methylation changes during preimplantation development.**

(A and B) Boxplot of GC% (A) and the number of CpG dinucleotides (B) in Group1 and Group2 tiles. No significant difference was found. Red line represents the median, boxes and whiskers represent for the 25<sup>th</sup> and 75<sup>th</sup>, and 2.5<sup>th</sup> and 97.5<sup>th</sup> percentiles, respectively.

(C) Pie charts showing similar distribution of Group1 and Group2 tiles across the whole genome.

(D) Percentage of Group1 and Group 2 tiles overlapping with various types of repeats. In parentheses are the number of tiles overlapping with the indicated repeat and its percentage in all repeat-overlapping tiles. “Other” stands for all other repeats in the RepeatMasker annotation.

(E) Dynamic methylation levels of Group 1 and Group 2 tiles during embryonic development.

Related to Figure 4

**Table S1. Summary of RRBS libraries, Related to Figure 1,3 and 6**

| Samples      |      | Total sequencing reads | Mapped reads | Percentage of mapped reads (%) | 1x covered CpGs | 10x covered CpGs | Bisulfite conversion rate (%)* |
|--------------|------|------------------------|--------------|--------------------------------|-----------------|------------------|--------------------------------|
| Sperm        | rep1 | 29,747,134             | 18,765,110   | 63.1                           | 2,254,893       | 1,328,659        | 99.8                           |
|              | rep2 | 29,180,210             | 18,485,981   | 63.4                           | 2,258,808       | 1,334,837        | 99.8                           |
| WT-Pat       | rep1 | 51,105,126             | 13,236,983   | 25.9                           | 1,007,517       | 815,257          | 99.4                           |
|              | rep2 | 41,712,954             | 22,688,646   | 54.4                           | 1,590,377       | 1,266,998        | 99.5                           |
| CKO-Pat      | rep1 | 44,701,774             | 21,008,689   | 47.0                           | 1,659,377       | 1,259,350        | 99.5                           |
|              | rep2 | 40,313,345             | 24,819,865   | 61.6                           | 1,606,509       | 1,278,377        | 99.6                           |
| WT-Pat-Aphi  | rep1 | 42,227,313             | 7,534,456    | 17.8                           | 1,111,922       | 735,957          | 99.3                           |
|              | rep2 | 29,291,984             | 17,017,265   | 58.1                           | 1,047,183       | 870,950          | 99.6                           |
| CKO-Pat-Aphi | rep1 | 29,963,268             | 17,573,136   | 58.6                           | 1,134,193       | 922,740          | 99.4                           |
|              | rep2 | 29,963,837             | 17,204,673   | 57.4                           | 1,209,495       | 980,802          | 99.6                           |
| Oocyte       | rep1 | 29,943,617             | 15,450,790   | 51.6                           | 1,724,374       | 1,019,638        | 97.3                           |
|              | rep2 | 28,928,937             | 17,025,969   | 58.9                           | 1,679,282       | 1,053,136        | 97.3                           |
| WT-Mat       | rep1 | 40,854,440             | 24,055,390   | 58.9                           | 1,523,143       | 1,219,347        | 98.4                           |
|              | rep2 | 34,935,651             | 21,398,069   | 61.2                           | 1,697,489       | 1,285,275        | 98.4                           |
| CKO-Mat      | rep1 | 37,996,767             | 23,255,783   | 61.2                           | 1,675,651       | 1,296,135        | 98.4                           |
|              | rep2 | 41,753,044             | 25,761,755   | 61.7                           | 1,624,804       | 1,296,411        | 98.6                           |
| WT-Mat-Aphi  | rep1 | 30,244,242             | 17,671,244   | 58.4                           | 1,087,055       | 871,425          | 97.2                           |
|              | rep2 | 28,133,383             | 11,389,706   | 40.5                           | 1,130,535       | 834,662          | 97.1                           |
| CKO-Mat-Aphi | rep1 | 28,299,439             | 16,262,537   | 57.5                           | 1,204,027       | 949,076          | 97.4                           |
|              | rep2 | 24,598,965             | 14,822,370   | 60.3                           | 1,135,355       | 886,134          | 96.9                           |

\* Bisulfite conversion rates were estimated by non-converted cytosines in non-CpG context. The lower bisulfite conversion rates of maternal DNA compared with paternal DNA are likely due to the high non-CpG methylation in oocytes.

**Table S2. Summary of RNA-Seq libraries, Related to Figure 5**

| Samples          |      | Total sequencing reads | Mapped reads | Uniquely mapped reads | Percentage of mapped reads (%) | Percentage of uniquely mapped reads (%) |
|------------------|------|------------------------|--------------|-----------------------|--------------------------------|-----------------------------------------|
| 2-cell (WT)      | rep1 | 35,456,463             | 29,722,881   | 24,018,174            | 83.8%                          | 67.7%                                   |
|                  | rep2 | 39,869,462             | 33,571,526   | 26,986,698            | 84.2%                          | 67.7%                                   |
| 2-cell (CKO)     | rep1 | 42,909,250             | 36,562,645   | 28,994,981            | 85.2%                          | 67.6%                                   |
|                  | rep2 | 39,387,774             | 31,958,686   | 24,814,813            | 81.1%                          | 63.0%                                   |
| Blastocyst (WT)  | rep1 | 47,194,520             | 42,007,710   | 38,430,485            | 89.0%                          | 81.4%                                   |
|                  | rep2 | 52,532,715             | 46,854,549   | 42,588,042            | 89.2%                          | 81.1%                                   |
| Blastocyst (CKO) | rep1 | 58,912,595             | 52,718,203   | 48,106,791            | 89.5%                          | 81.7%                                   |
|                  | rep2 | 59,554,859             | 52,711,629   | 47,838,721            | 88.5%                          | 80.3%                                   |

## **SUPPLEMENTAL EXPERIMENTAL PROCEDURES**

### **Generation of Tet3 conditional knockout mice**

Tet3 conditional knockout targeting vector (pWS-TK6-Tet3CKO) was constructed based on a RED recombinase-mediated recombineering system (Wu et al., 2008). Briefly, BAC clone (RP23-331I23) was modified by introducing two LoxP sites into the regions flanking exons 7-9. The Tet3 gene targeting in the embryonic stem cells (129 background) and the establishment of founder mouse lines were performed by the transgenic core facility at the University of North Carolina at Chapel Hill. The procedure was approved by the IACUC at UNC-CH. A selected marker was removed from the genome by crossing with Flp mice. The mice were then crossed with C57BL/6J mice with a Zp3-Cre transgene. The tail tips were used for genotyping floxed (2loxP) and deleted (1loxP) alleles. The primers used for genotyping were the following: Tet3-genotype-F2, 5'-GATTAAGTCATGCTCCACCACC-3'; Tet3-genotype-F3, 5'-TTCTACGGCTGTGTGTATGAC-3'; Tet3-genotype-R1, 5'-CATACTCACTGACACAGAAAGC-3'. The primers F2 and R1 were used for detection of 1 floxed allele. The primers F3 and R1 were used for detection of 2 floxed alleles.

### **Reverse transcription and Sanger sequencing**

cDNAs from GV oocytes were prepared by using SuperScript III CellsDirect cDNA Synthesis Kit (Life technologies). The deleted region of the Tet3 cDNA was amplified with the following primers: Exon 6 (5'-CCGGATTGAGAAGGTCATCTAC-3') and Exon 10 (5'-AGCGATTGTCTTCCTTGGTCAG-3'). The PCR products were gel extracted and subcloned into TOPO-TA Cloning Kit (Life technologies). After extracting the plasmids, the inserted PCR products were read by Sanger sequencing.

### **RNA-Seq and data analysis**

MII oocytes were collected from superovulated CKO (Zp3-Cre, f/-) or WT (f/f) females. The oocytes were transferred into the HTF medium and fertilized in vitro with sperms from adult CAST/EiJ males. Zygotes that had 2 pronuclei were cultured in KSOM (Millipore). Ten of 2-cell embryos and seven of blastocysts at 30 or 96 hours after



fertilization, respectively, were washed with PBS containing 0.03% BSA. They were then transferred into 0.2 ml tubes and stored at -80°C until use.

To prepare RNA-Seq libraries, frozen 2-cell embryos and blastocysts (2 replicates per sample) were directly lysed and used for cDNA synthesis using SMARTer Ultra Low Input RNA cDNA preparation kit (Clontech) following manufacturer's instructions. After amplification, the cDNA samples were fragmented to an average size of 150 bp using a Covaris M220 sonicator (Covaris). Fragmented DNA was subjected to standard Illumina sequencing library preparation using NEBNext Ultra DNA Library Prep Kit for Illumina (New England Biolabs) following manufacturer's instructions. Single-end 50 bp sequencing was performed on a HiSeq 2500 sequencer (Illumina). Sequencing reads were mapped to the mouse genome (mm9) with TopHat v2.0.10 coupled with Bowtie v2.1.0. For coding genes, the mapped reads were subjected to Cufflinks v2.2.0 with the reference annotation (UCSC gene models) for calculation of expression levels and identification of differentially expressed genes. Expression levels of repeats were estimated by calculating the uniquely mapped reads located in each type of repetitive elements followed by normalization to total uniquely mapped reads. Statistical analyses were implemented with R (<http://www.r-project.org/>).

## **REFERENCES**

Wu, S., Ying, G., Wu, Q., and Capecchi, M.R. (2008). A protocol for constructing gene targeting vectors: generating knockout mice for the cadherin family and beyond. *Nature protocols* 3, 1056-1076.
